# Supplementary material for: Enzymes involved in DNA ligation and end-healing in the radioresistant bacterium Deinococcus radiodurans
Source: PubMed Central journal article supplement (PMC1997131; doi:10.1186/1471-2199-8-69), 2007-08-16
Supplement: 1471-2199-8-69-S1.pdf [file 1471-2199-8-69-S1.pdf]

**Additional file 1.** Factors tested to detect DNA ligation activity of the DRB0100 gene product

| <b>Factor</b>              | <b>Details</b>                                                             |
|----------------------------|----------------------------------------------------------------------------|
| pH                         | 5.5- 8.5                                                                   |
| AMP donor                  | ATP or NAD <sup>+</sup>                                                    |
| divalent cation            | Mn <sup>2+</sup> , Mg <sup>2+</sup> , Co <sup>2+</sup> or Ni <sup>2+</sup> |
| <b>Proteins added</b>      | <b>Origin</b>                                                              |
| <i>D. radiodurans</i> PprA | Gift from I. Narumi                                                        |
| <i>D. radiodurans</i> LigA | this work                                                                  |
| <i>D. radiodurans</i> PNKP | this work                                                                  |
| <i>D. radiodurans</i> SSB  | Gift from M. Cox                                                           |
| <i>D. radiodurans</i> RecA | Gift from M. Cox                                                           |
| <i>D. radiodurans</i> DdrA | Gift from M. Cox                                                           |
| Bovine Serum Albumin       | New England Biolabs                                                        |
