# Supplementary material for: Enzymes involved in DNA ligation and end-healing in the radioresistant bacterium Deinococcus radiodurans
Source: PubMed Central journal article supplement (PMC1997131; doi:10.1186/1471-2199-8-69), 2007-08-16
Supplement: 1471-2199-8-69-S2.pdf [file 1471-2199-8-69-S2.pdf]

**Additional file 2.** Ligation substrates tested to detect DNA ligation activity of the DRB0100 gene product

| <b><i>Ligation substrates prepared by annealing of the following oligonucleotides (* indicates <sup>32</sup>P label)</i></b> |
|------------------------------------------------------------------------------------------------------------------------------|
| 5'-*CCUGCAACAGUGCCACGCUGAGAGC-3'                                                                                             |
| 5'-CCUGCAACAGUGCCACGCUGAGAGC-3'<br>5'-*CAGCAGCAAUGAAAAAUC-3'                                                                 |
| 5'-AGATTTTTCATTTGCTGCTGGCTCTCAGCGTGGCACTGTTGCAGGC-3'                                                                         |
| 5'-CCTGCAACAGTGCCACGCTGAGAGC-3'<br>5'-*CAGCAGCAAUGAAAAAUC-3'                                                                 |
| 5'-AGATTTTTCATTTGCTGCTGGCTCTCAGCGTGGCACTGTTGCAGGC-3'                                                                         |
| 5'-CCUGCAACAGUGCCACGCUGAGAGC-3'<br>5'-*CAGCAGCAAATGAAAAATC-3'                                                                |
| 5'-AGATTTTTCATTTGCTGCTGGCTCTCAGCGTGGCACTGTTGCAGGC-3'                                                                         |
| 5'-*CTAGGTTAGCATGACCGCTG-3'                                                                                                  |
| 5'-GTCATGCTAACCTAGCAGCG-3'                                                                                                   |

Ligation substrates tested to detect DNA ligation activity of the DRB0100 gene product. In addition, various blunt-ended DNA substrates have been tested. The substrates have also been used for electromobility shift experiments, but no binding of the DRB0100 gene was detectable.
